# Supplementary material for: Development and evaluation of screening dysphagia tools for observational studies and routine care in cancer patients
Source: PubMed Central journal article supplement — Health Sci Rep. 2018 May 21;1(7):e48. doi: 10.1002/hsr2.48 (PMC6266365; doi:10.1002/hsr2.48), 2018-05-21
Supplement: HSR2-1-e48-s001.pdf [file HSR2-1-e48-s001.pdf]

**SUPPLEMENTAL FIGURE 1:**

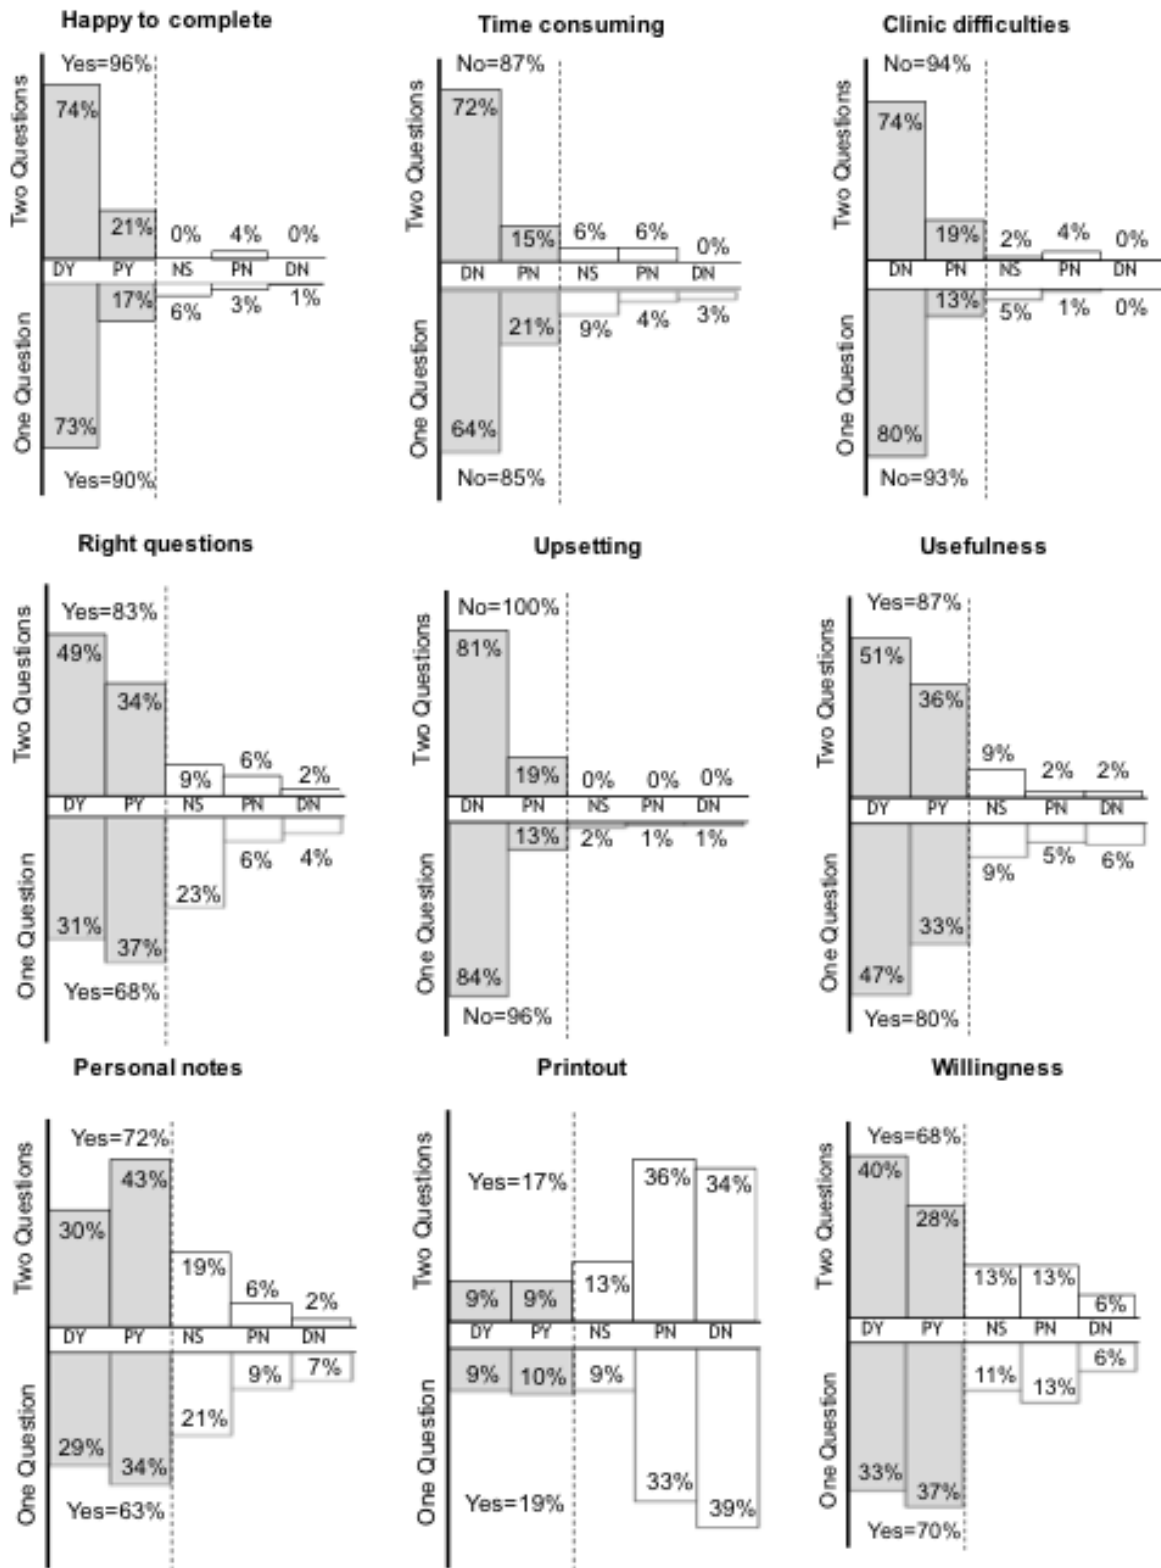

**SUPPLEMENTAL FIGURE 1. Feasibility and acceptability responses for Phase 2 Screener.**  
DY=definitely yes, PY=probably yes, NS=not sure, PN=probably not, DN=definitely not.
